# Supplementary material for: Esmolol Use in Dual Axis Defibrillation Resistant Ventricular Fibrillation
Source: Case Rep Cardiol. 2020 May 17;2020:7297303. doi: 10.1155/2020/7297303 (PMC7251428; doi:10.1155/2020/7297303)
Supplement: Supplementary Materials — Video 1: cardiac catheterization revealing complete blockage of the left anterior descending artery with no flow of contrast. Supplementary Materials. Video 2: cardiac catheterization showing the complete restoration of the flow into left anterior descending artery post drug-eluting stent deployment. [file 7297303.f1.zip]

Archive with 5 entries (4 files):
- Video 1.mp4
- __MACOSX/
- __MACOSX/._Video 1.mp4
- Video 2.mp4
- __MACOSX/._Video 2.mp4
